# Supplementary material
Source: MDPI journal article supplement (https://www.mdpi.com/2071-1050/15/3/2399)
Supplement: s1 [file s1 › sustainability-2147110-supplementary.pdf]

Table S1: The developed questionnaire in the current study.

| Domain                                       | Item code | Item                                                                                                           |
|----------------------------------------------|-----------|----------------------------------------------------------------------------------------------------------------|
| Demographic and care-related characteristics | Dem_01    | Gender                                                                                                         |
|                                              | Dem_02    | Age (year)                                                                                                     |
|                                              | Dem_03    | Income (USD)                                                                                                   |
|                                              | Dem_04    | Type of care                                                                                                   |
| Service Quality                              | SQ_01     | Medical staff responsive to my concerns                                                                        |
|                                              | SQ_02     | Medical staff friendly                                                                                         |
|                                              | SQ_03     | Ability to get highly customized medical service                                                               |
|                                              | SQ_04     | Medical staff instilled confidence during my treatment                                                         |
|                                              | SQ_05*    | Service provided by the staff was reliable                                                                     |
|                                              | SQ_06*    | The treatment was effective                                                                                    |
| Medical Tourism Expenses                     | Expen_01  | The destination offered a lower price for treatments                                                           |
|                                              | Expen_02* | The treatment was affordable                                                                                   |
|                                              | Expen_03  | The destination offered advanced treatments at competitive prices                                              |
|                                              | Expen_04* | The food was affordable                                                                                        |
|                                              | Expen_05* | The lodging (hotel) was affordable                                                                             |
|                                              | Expen_06  | The local traveling was affordable                                                                             |
| Medical Tourism Infrastructure               | Infra_01  | The clinical hospitals maintained adequate hygiene                                                             |
|                                              | Infra_02  | The clinical hospital was clean and tidy                                                                       |
|                                              | Infra_03  | The clinical hospital has up-to-date infrastructure and facilities                                             |
| Clinical Trust                               | Trust_01  | I have trust in clinical hospitals in Sharm Elsheikh provided the best deal.                                   |
| Well-being in medical tourism                | Being_01  | I feel healthy and happy when staying at clinicals in Sharm El sheikh                                          |
|                                              | Being_02  | I feel emotional well-being while staying at clinicals in Sharm El sheikh                                      |
| Intention to revisit the destination         | Inten_01* | I predict I will revisit destination clinicals in the future                                                   |
|                                              | Inten_02  | I would visit destination rather than any other medical destination                                            |
|                                              | Inten_03  | If I need medical service in the future, I will consider destination clinicals hospitals as my first choice    |
|                                              | Inten_04  | I will recommend this hospital to family and friends                                                           |
|                                              | Inten_05  | If I need medical service in the future, I will consider clinical hospitals in destination as my first choice. |

\*An asterisk indicates an excluded item as per the exploratory factor analysis.
